# Supplementary material for: Efficient hydrogen evolution of Ni2P via incorporation of Mo for alkaline freshwater and seawater electrolysis
Source: Royal Society of Chemistry journal article supplement (doi:10.1039/d2nj03820j), 2022-01-01
Supplement: d2nj03820j1.pdf [file d2nj03820j1.pdf]

## Supporting information

### Efficient hydrogen evolution of Ni<sub>2</sub>P via incorporation of Mo for alkaline freshwater and seawater electrolysis

Xiao Li<sup>a</sup>, Yudong Wu<sup>a</sup>, Shanshan Li<sup>a</sup>, Yinchun Dai<sup>a</sup>, Jibiao Guan<sup>a</sup>, Baochun Guo<sup>b</sup>, Ming Zhang<sup>a\*</sup>

<sup>a</sup>National Engineering Lab for Textile Fiber Materials and Processing Technology, Zhejiang Sci-Tech University, Hangzhou 310018, PR China

<sup>b</sup>Department of Polymer Materials and Engineering, South China University of Technology, Guangzhou 510640, P.R. China

Email: zhangming@zstu.edu.cn

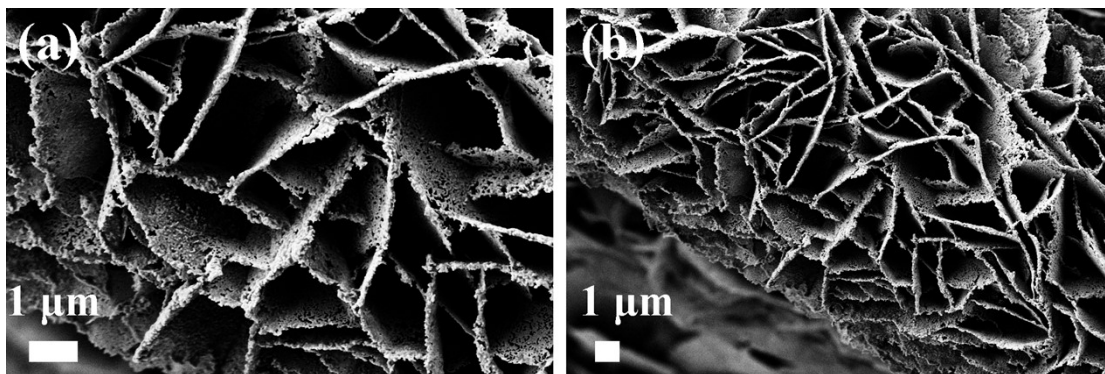

Fig. S1 SEM images of Ni<sub>2</sub>P/CC electrocatalyst at (a) 10k magnifications. (b) 5k magnifications.

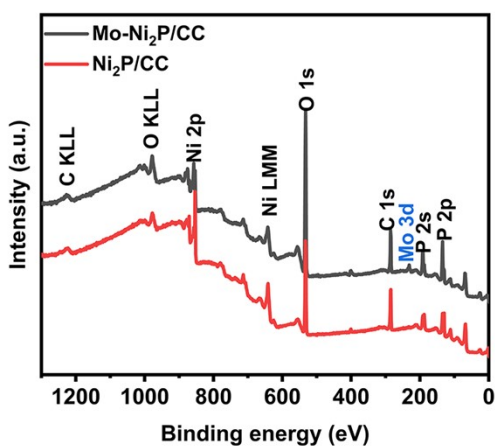

Fig. S2 XPS survey of Mo-Ni<sub>2</sub>P/CC and Ni<sub>2</sub>P/CC electrocatalyst.

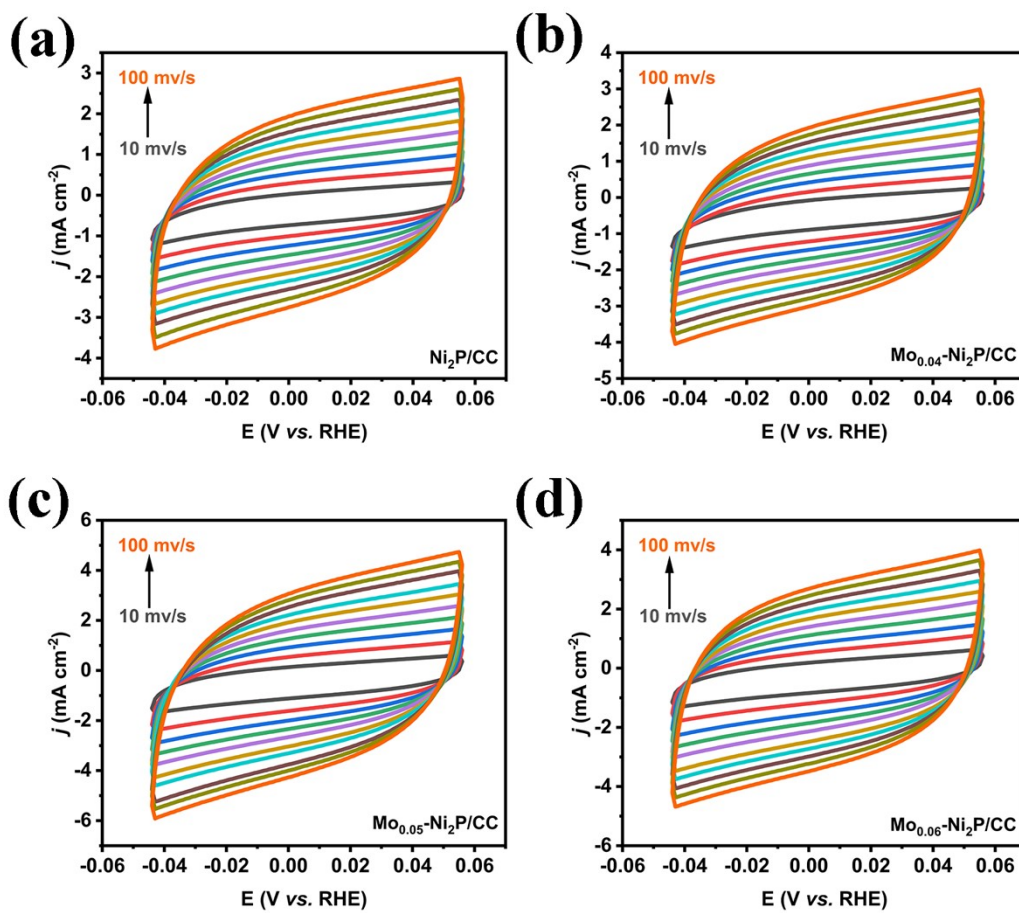

Fig.S3 Cyclic voltammograms of (a) Ni<sub>2</sub>P/CC, (b) Mo<sub>0.04</sub>-Ni<sub>2</sub>P/CC, (c) Mo<sub>0.05</sub>-Ni<sub>2</sub>P/CC and (d) Mo<sub>0.06</sub>-Ni<sub>2</sub>P/CC from 10 to 100 mV s<sup>-1</sup>.

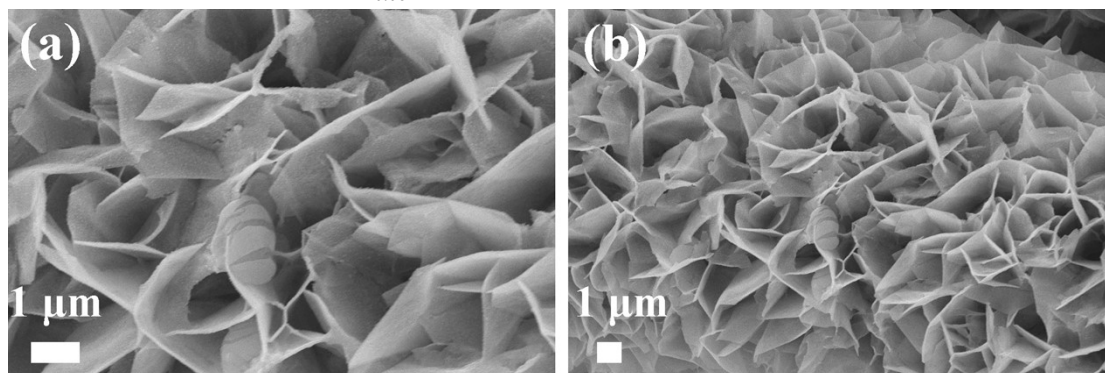

Fig. S4 SEM images of Mo-Ni<sub>2</sub>P/CC after 20 hour-long term HER in 1 M KOH solution.

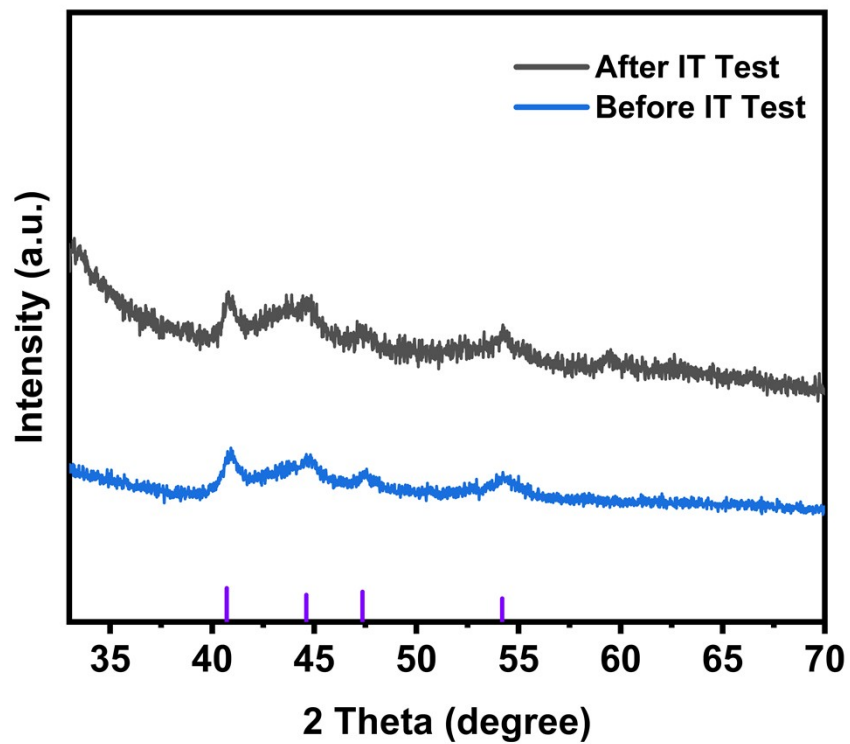

Fig. S5 XRD pattern of Mo-Ni<sub>2</sub>P after stability in 1 M KOH.

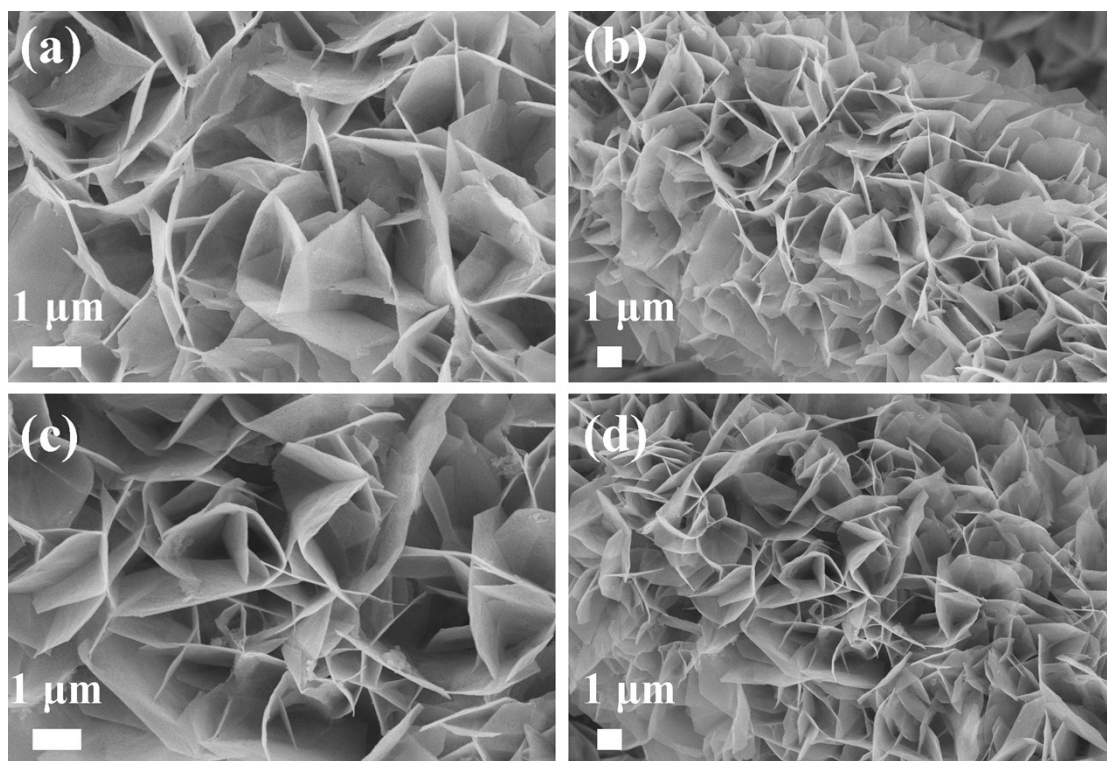

Fig. S6 SEM images of Mo-Ni<sub>2</sub>P/CC after 20 hour-long HER in (a-b) simulated seawater and (c-d) alkaline seawater solution.

**Table S1. The composition of the Mo-Ni<sub>2</sub>P/CC.**

| Catalyst                | Element | Weight % | Atomic % |
|-------------------------|---------|----------|----------|
| Mo-Ni <sub>2</sub> P/CC | Ni      | 64.63    | 51.35    |
|                         | P       | 30.85    | 46.45    |
|                         | Mo      | 4.52     | 2.20     |

**Table S2. Comparison the influence of mass loading on HER.**

| Catalysts                                 | mass loading (mg cm <sup>-2</sup> ) | Overpotential at 10 mA cm <sup>-2</sup><br>(mV) |
|-------------------------------------------|-------------------------------------|-------------------------------------------------|
| Ni <sub>2</sub> P/CC                      | 2.98                                | 166                                             |
| Mo <sub>0.04</sub> - Ni <sub>2</sub> P/CC | 3.02                                | 139                                             |
| Mo <sub>0.05</sub> - Ni <sub>2</sub> P/CC | 3.05                                | 113                                             |
| Mo <sub>0.06</sub> - Ni <sub>2</sub> P/CC | 3.09                                | 141                                             |
